# Supplementary material
Source: Research Square preprint supplement (doi:10.21203/rs.3.rs-8997181/v1)
Supplement: Supplementary file 1 [file 0f3d6f15806ef38517d9674d.pdf]

# Sampling-Efficient Unconditional Pure-Deblurring Diffusion Models via Noise-Augmented Generation

– Supplementary Materials –

## 1 Sampling

Figure 1 shows examples of sampling sequences  $u_T, \dots, u_1$  for  $T = 16$  (extending those of Figure 4 of the paper). Figure 2 shows additional uncurated  $128 \times 128$  samples (extending those of Figure 5 of the paper). Figure 3 shows Flower-102 and Stanford-Cars samples at a high resolution of  $256 \times 256$  (extending those of Figure 5 of the paper).

## 2 Interpolation

Figure 4 shows additional interpolation sequences (extending those of Figure 9 of the paper).

## 3 Diversity

Figure 5 shows additional diversity sets (extending those of Figure 8 of the paper).

## 4 Generalization (Nearest Neighbors)

Figure 6 shows additional nearest-neighbor examples (extending those of Fig. 7 of the paper).

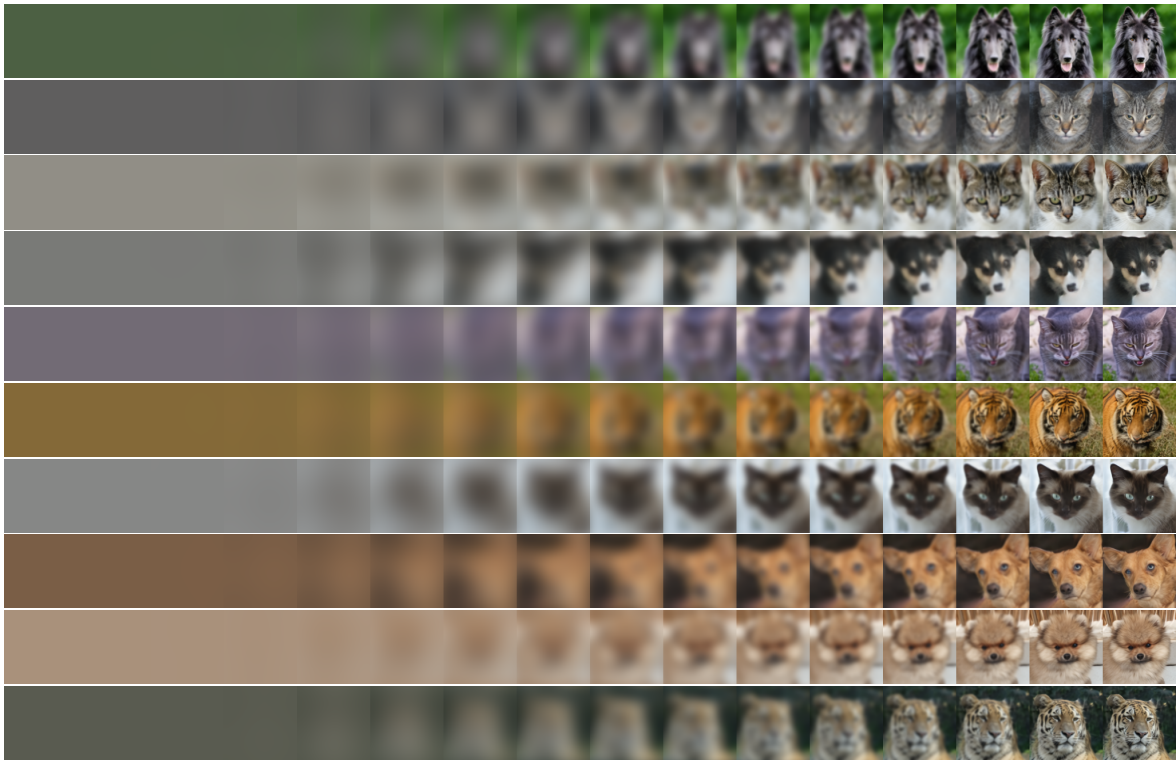

(a) AFHQv2

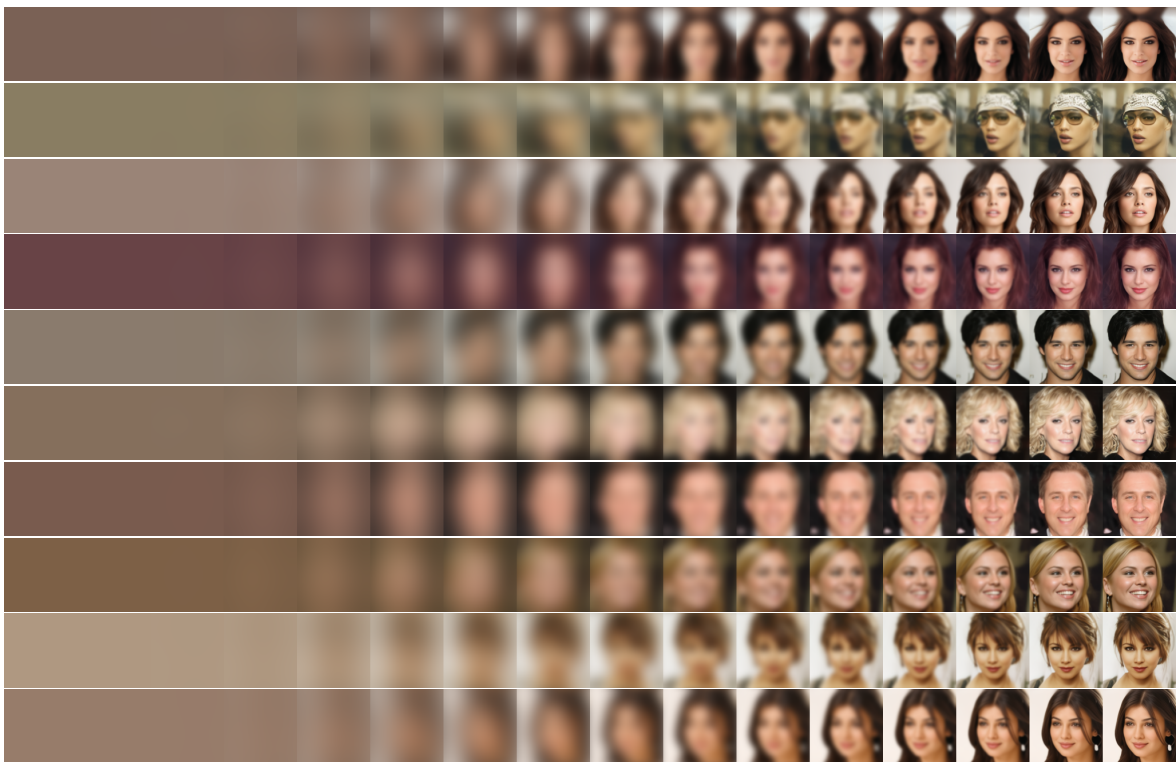

(b) CelebA-HQ

**Figure 1. Reverse sampling process. Shown for 16 step sampling.**

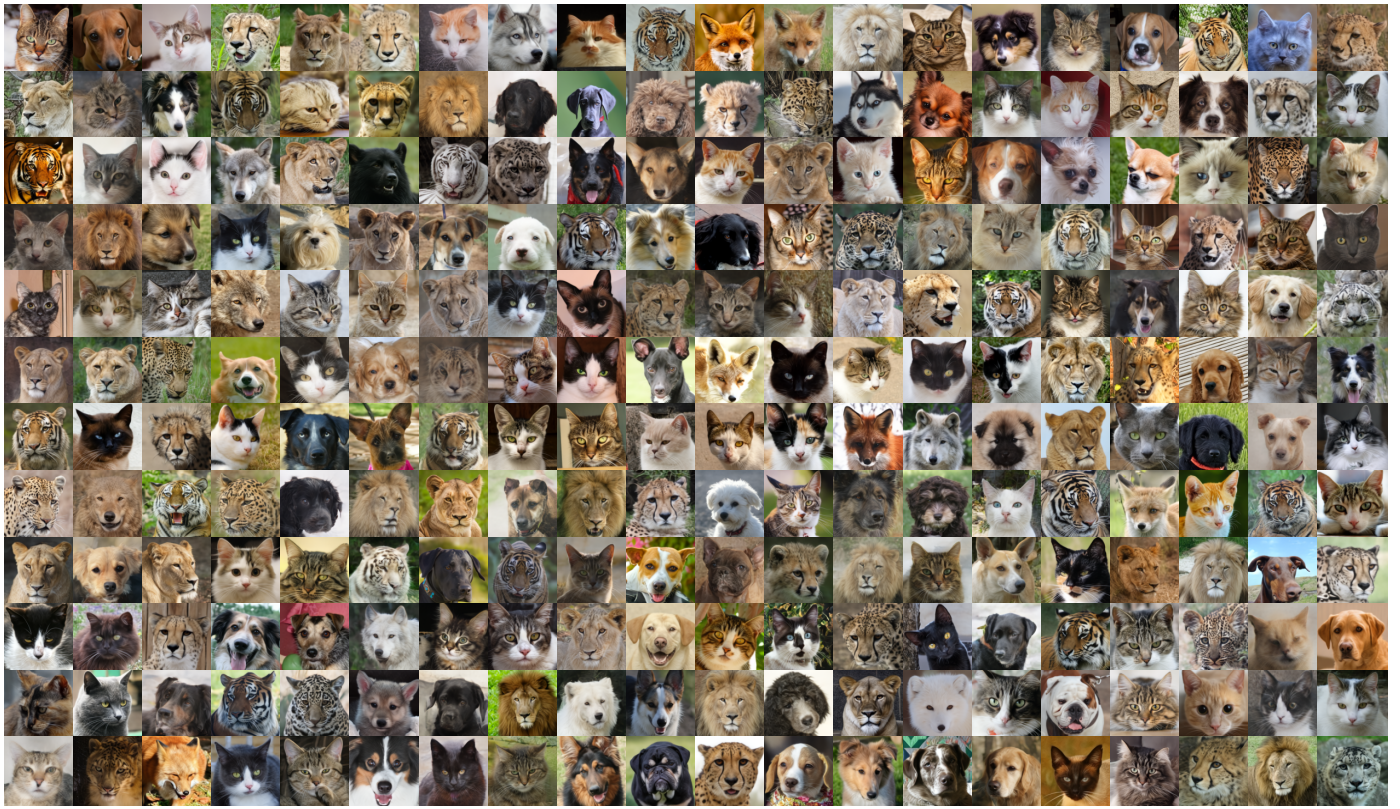

(a) AFHQv2

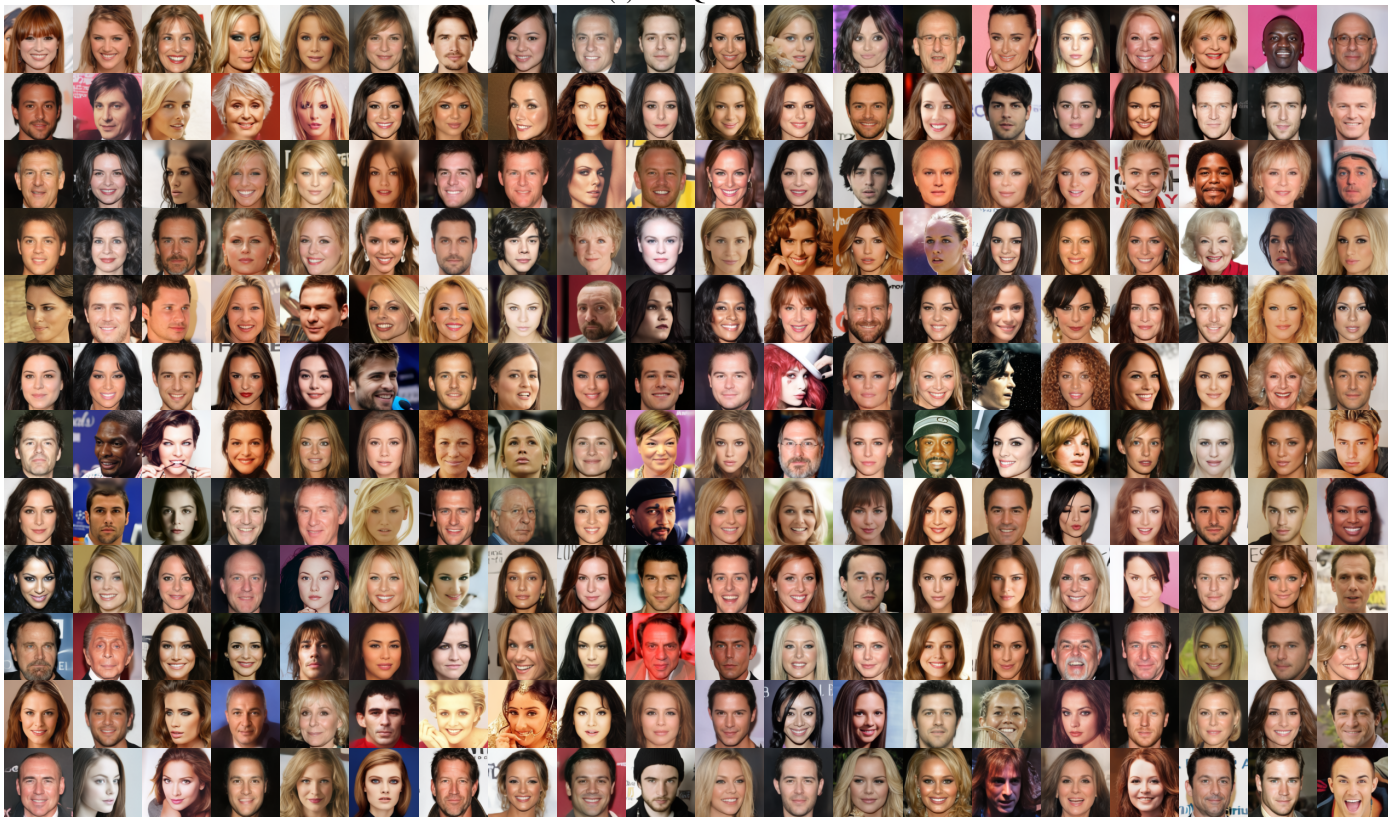

(b) CelebA-HQ

**Figure 2. Uncurated samples at 128x128**

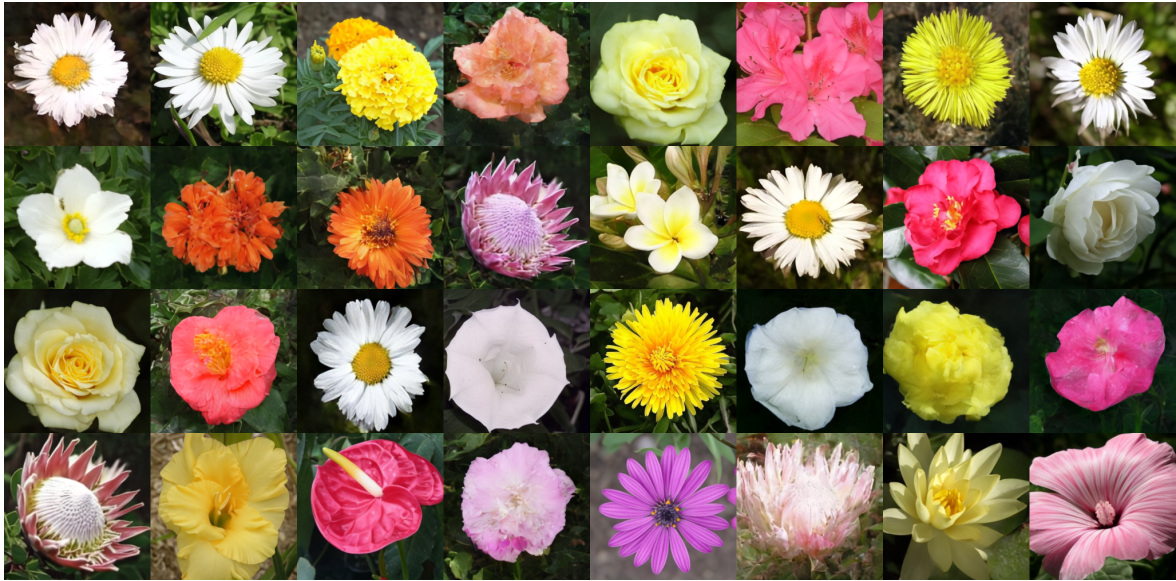

(b) Flowers-102

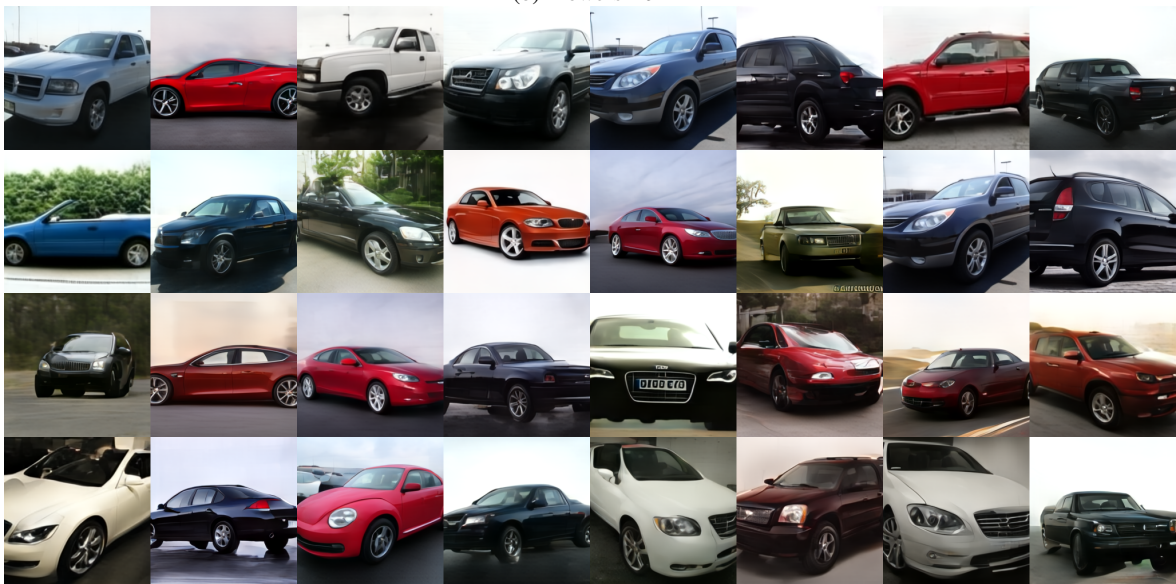

(b) Flowers-102

**Figure 3. Uncurated samples at  $256 \times 256$**

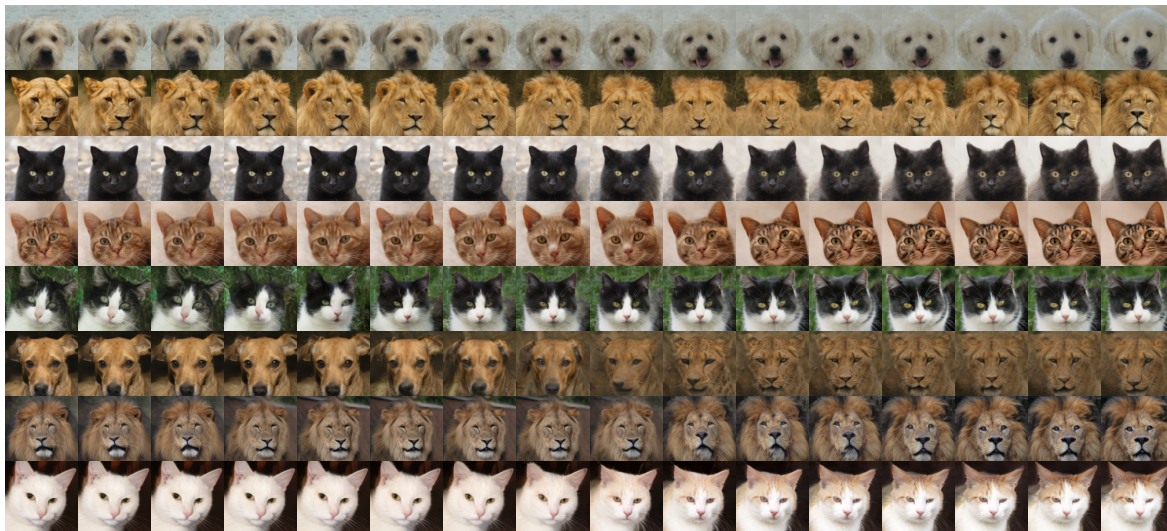

(a) AFHQv2

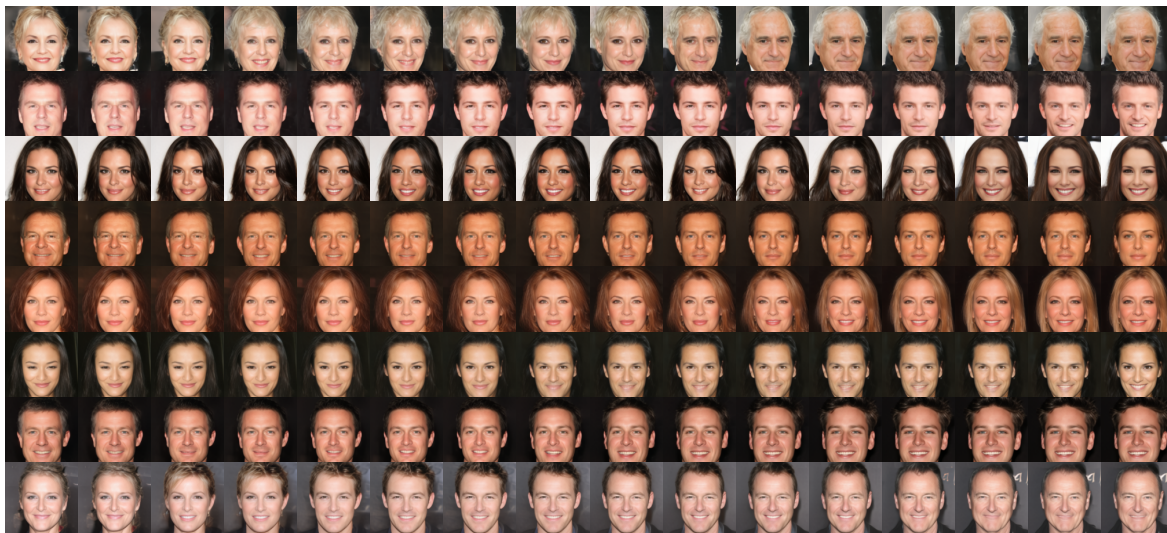

(b) CelebA-HQ

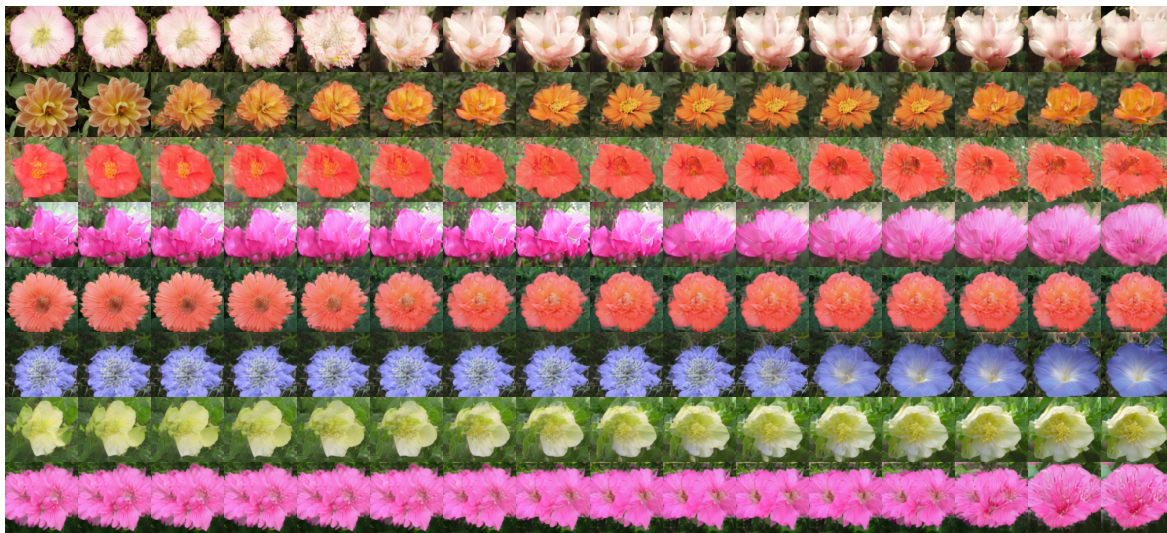

(c) Flowers-102

**Figure 4.** Interpolations between random pairs of fake images that were generated from same initial random color.

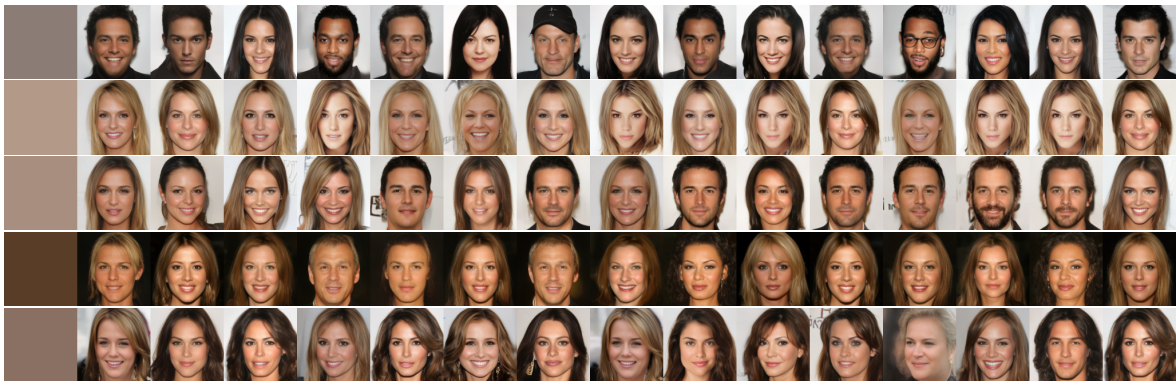

**Figure 5. Diversity of samples**, starting from a single initial image (leftmost in each row). Our results on CelebA-HQ @ 128.

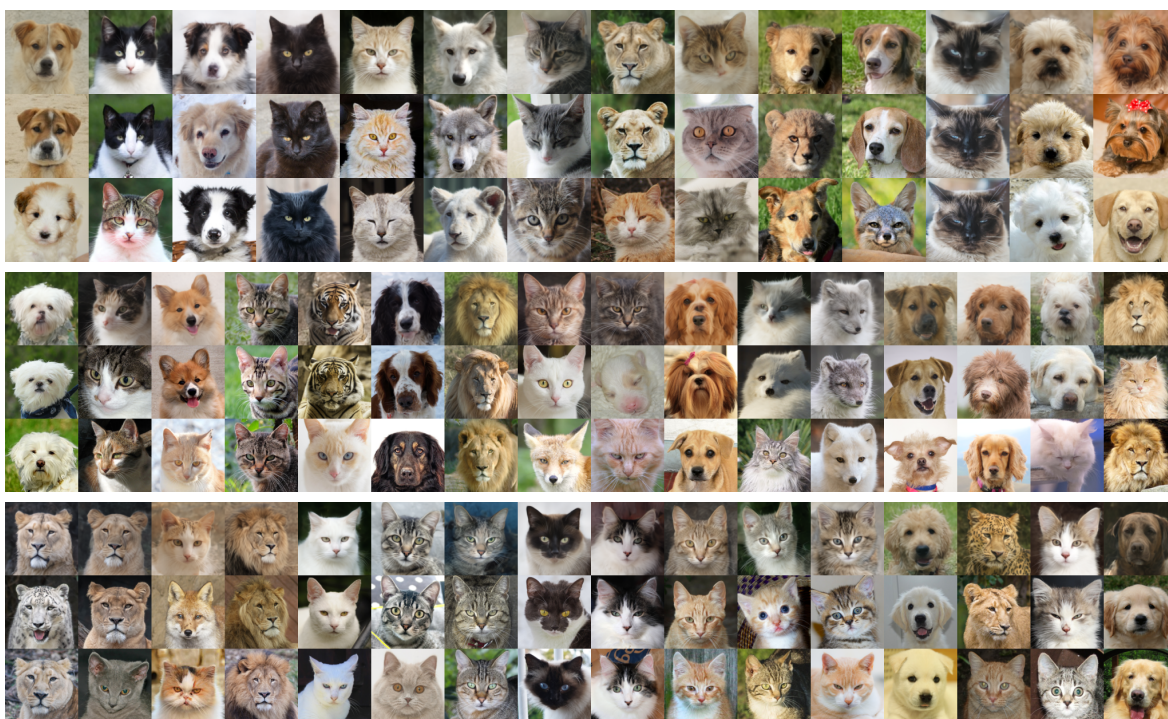

(a) AFHQv2

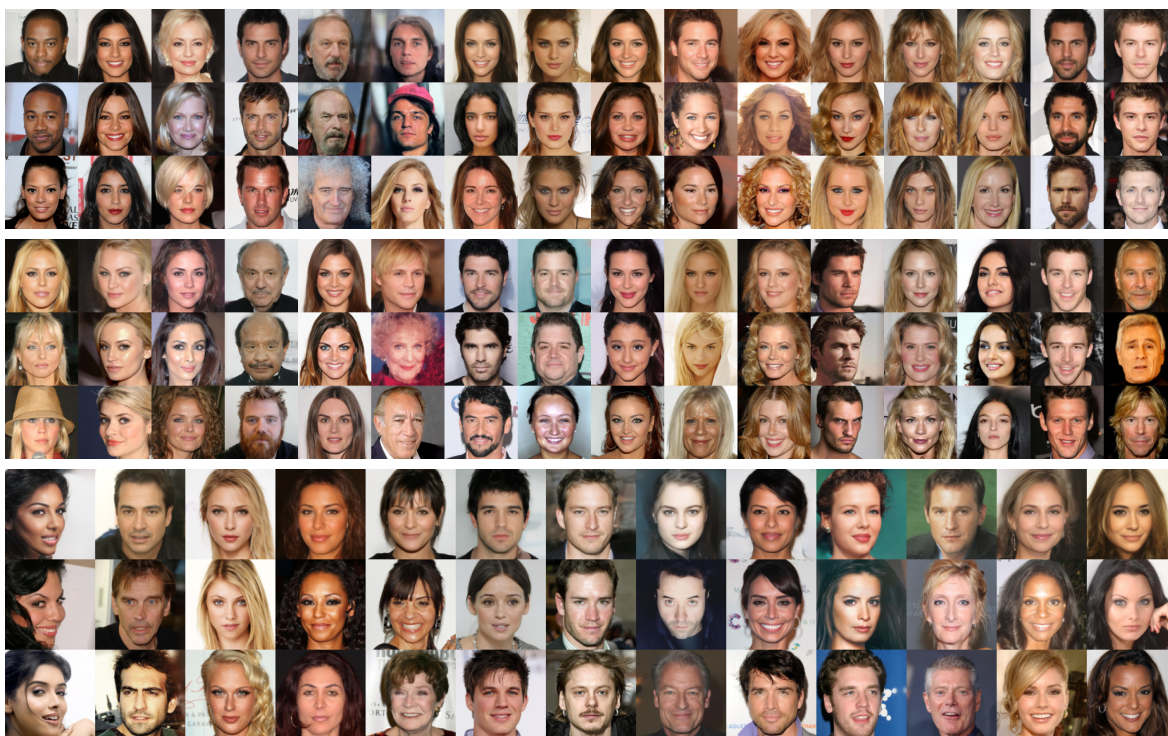

(b) CelebA-HQ

**Figure 6. Training-set nearest neighbors (NNs) of generated (fake) images.** For each panel: fakes (top row), 1st NN (middle row), 2nd NN (bottom row).
